# Supplementary material for: The Effects of Genetic and Epigenetic Alterations of BARD1 on the Development of Non-Breast and Non-Gynecological Cancers
Source: PubMed Central journal article supplement (PMC7396976; doi:10.3390/genes11070829), 2020-07-21
Supplement: genes-11-00829-s001.pdf [file genes-11-00829-s001.pdf]

**Supplemental Table 1.** All reported SNPs of *BARD1* gene detected in NB

| <b>Neuroblastoma</b> |                      |          |                |                                                                             |                                                                                                       |                                                                                                                                                                              |                                                                                                            |                        |                                                          |
|----------------------|----------------------|----------|----------------|-----------------------------------------------------------------------------|-------------------------------------------------------------------------------------------------------|------------------------------------------------------------------------------------------------------------------------------------------------------------------------------|------------------------------------------------------------------------------------------------------------|------------------------|----------------------------------------------------------|
| SNP                  | Susceptibility to NB | Location | Allelic change | Function                                                                    | Mechanism                                                                                             | Associates with                                                                                                                                                              | Population                                                                                                 | Linkage disequilibrium | Presence in breast or gynecological cancers?             |
| rs6435862            | ↑                    | Intron 1 | T>G            | Removes exons 2 and 3 and produces the oncogenic BARD1 $\beta$ isoform [90] | BARD1 $\beta$ interacts with and stabilizes Aurora kinase A and B (independent of p53 and PARP1) [90] | UK, AA/US: high-risk [85,87]<br>EA/US: high-risk [85,86], stage 4N, MYCN amp, age > 18 mos. [86]<br>Chinese: adrenal origin, stage IV, stage III & IV, age > 12 mos. [88,89] | European Americans [85,86], UK Caucasians [85], Italians [86], African Americans [87], Han Chinese [88,89] |                        |                                                          |
| rs3768716            | ↑                    | Intronic | A>G            |                                                                             |                                                                                                       | EA/US, UK, Italians: high-risk [85,86]<br>Chinese: adrenal origin, stage III & IV [88,89], age > 12 mos. [89]                                                                | European Americans [85,86], UK Caucasians [85], Italians [86], African Americans [87], Han Chinese [88,89] |                        |                                                          |
| rs17487792           | ↑                    | Intronic | C>T            |                                                                             |                                                                                                       | EA/US: high-risk [85]<br>Chinese: adrenal origin, stage IV [88]                                                                                                              | European Americans [85], African Americans [87], Han Chinese [88]                                          |                        |                                                          |
| rs6712055            | ↑                    | Intronic | T>C            |                                                                             |                                                                                                       | EA/US: high-risk [85]                                                                                                                                                        | European Americans [85], African Americans [87]                                                            |                        | Breast – no risk [133]<br>Ovarian – increased risk [134] |
| rs7587476            | ↑                    | Intron 3 | C>T            |                                                                             |                                                                                                       | EA/US, AA/US: high-risk [85,87]                                                                                                                                              | European Americans [85], African Americans [87]                                                            |                        |                                                          |
| rs6715570            | ↑                    | Intronic | C>T            |                                                                             |                                                                                                       | EA/US: high-risk [85]                                                                                                                                                        | European Americans [85]                                                                                    |                        |                                                          |

|            |                              |                          |                         |                                                                                        |                                                                 |                                                                                                                             |                                                                                   |                               |                                                                            |
|------------|------------------------------|--------------------------|-------------------------|----------------------------------------------------------------------------------------|-----------------------------------------------------------------|-----------------------------------------------------------------------------------------------------------------------------|-----------------------------------------------------------------------------------|-------------------------------|----------------------------------------------------------------------------|
| rs7585356  | ↓                            | 3' UTR                   | G>A                     | Increases mRNA expression of BARD1-FL [86]                                             |                                                                 | EA/US: high-risk, stage 4N, MYCN amp, age < 18 mos. [86]<br>Italians: stage 4N, age < 18 mos. [86]<br>Chinese: females [89] | European Americans [85,86], Italians [86], Han Chinese [89]                       | rs16852600 (intronic) [85,95] |                                                                            |
| rs2070094  | ↓                            | Exon 6 (Val507Met)       | G>A                     |                                                                                        |                                                                 |                                                                                                                             | European Americans [85], Italians [86]                                            |                               | Breast – benign [135-138], increased risk [139]                            |
| rs2229571  | ↑(US, Chinese)<br>↓(Italian) | Exon 4 (Arg378Ser)       | G>C                     |                                                                                        |                                                                 | Chinese: adrenal origin, stage IV [88]                                                                                      | European Americans [85], Italians [86], Han Chinese [88]                          | rs1048108 [88]                | Breast – benign [135], decreased risk [136,137]<br>Cervical – benign [140] |
| rs1048108  | ↓                            | Exon 1 (Pro24Ser)        | C>T [85,86]<br>G>A [92] | Negatively regulates cellular development and modulates development and apoptosis [95] |                                                                 | EA/US, Italians, AA/US: high-risk [92]                                                                                      | European Americans [85,92], Italians [86,92], African Americans, Spaniards [92]   |                               | Breast – benign [135], decreased risk [136,137]<br>Cervical – benign [140] |
| rs17489363 | ↑                            | 5' UTR (promoter region) | C>T [92]<br>G>A [88]    | Decreases mRNA expression of BARD1-FL [88,92]                                          | Decreases transcriptional activity through binding of HSF1 [92] | EA/US, AA/US, Italians: high-risk [92]<br>Chinese: adrenal origin [88]                                                      | European Americans, African Americans, Italians, Spaniards [92], Han Chinese [88] | rs1129804<br>rs34732883 [88]  |                                                                            |
| rs16852804 | ↑                            | Intronic                 | C>T                     |                                                                                        |                                                                 |                                                                                                                             | African Americans [87]                                                            |                               |                                                                            |
| rs7599060  | ↑                            | Intronic                 | G>A                     |                                                                                        |                                                                 | AA/US: high-risk [87]                                                                                                       | African Americans [87]                                                            |                               |                                                                            |
| rs6720708  | ↑                            | Intronic                 | C>T                     |                                                                                        |                                                                 | EA/US: adrenal origin [94]                                                                                                  | European Americans [94]                                                           | rs17489363 [94]               |                                                                            |

|             |   |                        |                      |                                                                                                                     |  |                                               |                                                 |                   |                                                                                                                                       |
|-------------|---|------------------------|----------------------|---------------------------------------------------------------------------------------------------------------------|--|-----------------------------------------------|-------------------------------------------------|-------------------|---------------------------------------------------------------------------------------------------------------------------------------|
| rs373888    | ↑ | Exon 10<br>(Arg658Cys) | C>T                  |                                                                                                                     |  | Chinese: adrenal<br>origin [88]               | Han Chinese<br>[88]                             |                   | Breast – benign<br>or pathogenic<br>[146-148]<br>Ovarian –<br>likely benign<br>[19]<br>Breast/Ovarian<br>- likely benign<br>[149,150] |
| rs3768707   |   | Intronic               | C>T [88]<br>G>A [92] |                                                                                                                     |  | Chinese: adrenal<br>origin, stage III<br>[88] | Han Chinese<br>[88], European<br>Americans [92] |                   |                                                                                                                                       |
| rs16852600  |   | Intronic               |                      | Negatively<br>regulates<br>cellular<br>developme<br>nt and<br>modulates<br>developme<br>nt and<br>apoptosis<br>[95] |  |                                               |                                                 | rs7585356<br>[85] | Breast [135]                                                                                                                          |
| rs587781948 |   | Exon 10                | c.1921 C>T           | Truncated<br>protein<br>p.Arg641X<br>[115,116]                                                                      |  |                                               |                                                 |                   | Breast –<br>pathogenic<br>[141-144]                                                                                                   |
| p.Arg112X   |   | Exon 3                 | c.334 C>T            | Truncated<br>protein<br>p.Arg112X<br>[115]                                                                          |  |                                               |                                                 |                   | Breast –<br>pathogenic<br>[144,145]                                                                                                   |

Arrows indicate increased (↑) and decreased (↓) susceptibility to NB

**Supplemental Table 2.** All reported BARD1 variants in CRC, pancreatic cancer, NSCLC, nephroblastoma, Ewing sarcoma and AML

| <b>Colorectal cancer</b>                   |                |                     |                           |                                                                       |                          |                                                               |                                              |
|--------------------------------------------|----------------|---------------------|---------------------------|-----------------------------------------------------------------------|--------------------------|---------------------------------------------------------------|----------------------------------------------|
| Reported as                                | Allelic change | Coding DNA location | Protein change            | Function                                                              | Mechanism                | Associates with                                               | Presence in breast or gynecological cancers? |
| c.1811-2A>G                                | A>G            | 1811-2              |                           | Predicted to skip exon 9, leading to disruption of BRCT1 domain [105] |                          | Strong CRC inheritance? [105]                                 |                                              |
| c.1217G>A<br>p.Arg406Gln<br>(rs587780014)  | G>A            | 1217                | Arg406Gln                 | Predicted to disrupt ANK and BRCT domains [106]                       | Inhibits apoptosis [106] | Stage III or IV CRC? Diagnosis at age less than 50? [106]     |                                              |
| c.1918C>A<br>p.Leu640Ile<br>(rs1553612535) | C>A            | 1918                | Leu640Ile                 | Predicted to disrupt ANK and BRCT domains [106]                       | Inhibits apoptosis [106] | Stage III or IV CRC? Diagnosis at age less than 50? [106]     |                                              |
| β isoform [14]                             |                |                     | Lacks exons 2 and 3 [14]  |                                                                       |                          | shorter survival [14]                                         | Breast, ovarian, endometrial [13]            |
| γ isoform [14]                             |                |                     | Lacks exons 4-11 [14]     |                                                                       | Stabilizes BARD1-FL [14] |                                                               | Breast, ovarian, endometrial [13]            |
| δ isoform [14]                             |                |                     | Lacks exons 2-6 [14]      |                                                                       |                          | Age >60 y.o., increased survival [14]                         | Breast, ovarian, endometrial [13]            |
| ε isoform [14]                             |                |                     | Lacks exons 4-9 [14]      |                                                                       |                          |                                                               | Breast, ovarian, endometrial [13]            |
| η isoform                                  |                |                     | Lacks exons 2-9 [14]      |                                                                       |                          |                                                               | Breast, ovarian, endometrial [13]            |
| κ isoform                                  |                |                     | Lacks exon 3 [14]         |                                                                       |                          | T3 and T4, N1 and N2, Stage III and IV, shorter survival [14] |                                              |
| π isoform                                  |                |                     | Lacks part of exon 4 [14] |                                                                       |                          | Age >60 y.o., shorter survival [14]                           |                                              |
| φ isoform                                  |                |                     | Lacks exons 3-6 [14]      |                                                                       |                          | Age >60 y.o., increased survival [14]                         | Breast, ovarian, endometrial [13]            |
| BARD1-FL                                   |                |                     |                           |                                                                       |                          | Increased survival [14,101]                                   | Breast, ovarian, endometrial [13]            |

|               |  |  |                                                |  |  |  |  |
|---------------|--|--|------------------------------------------------|--|--|--|--|
| 1-7/9-11      |  |  | Lacks exon 8<br>[101]                          |  |  |  |  |
| 1-2/4-11      |  |  | Lacks exon 3<br>[101]                          |  |  |  |  |
| 1/4-11        |  |  | Lacks exons 2-3<br>[101]                       |  |  |  |  |
| 1-7/10-11     |  |  | Lacks exons 8-9<br>[101]                       |  |  |  |  |
| 1-6/10-11     |  |  | Lacks exons 7-9<br>[101]                       |  |  |  |  |
| 1-4a/5-11     |  |  | Lacks C-<br>terminal region<br>of exon 4 [101] |  |  |  |  |
| 1-3/5-11      |  |  | Lacks exon 4<br>[101]                          |  |  |  |  |
| 1-2/5-11      |  |  | Lacks exons 3-4<br>[101]                       |  |  |  |  |
| 1/5-11        |  |  | Lacks exons 2-4<br>[101]                       |  |  |  |  |
| 1-3/5-7/10-11 |  |  | Lacks exons 4, 8<br>and 9 [101]                |  |  |  |  |
| 1/5-6/8-11    |  |  | Lacks exons 2-4<br>and 7 [101]                 |  |  |  |  |
| 1/5-7/9-11    |  |  | Lacks exons 2-4<br>and 8 [101]                 |  |  |  |  |
| 1-3/8-11      |  |  | Lacks exons 4-7<br>[101]                       |  |  |  |  |
| 1-2/7-11      |  |  | Lacks exons 3-6<br>[101]                       |  |  |  |  |
| 1/5-7/10-11   |  |  | Lacks exons 2-4<br>and 8-9 [101]               |  |  |  |  |
| 1/7-11        |  |  | Lacks exons 2-6<br>[101]                       |  |  |  |  |
| 1-3/10-11     |  |  | Lacks exons 4-9<br>[101]                       |  |  |  |  |
| 1-2/10-11     |  |  | Lacks exons 3-9<br>[101]                       |  |  |  |  |
| 1/10-11       |  |  | Lacks exons 2-9<br>[101]                       |  |  |  |  |

| BARD1 9'L                             |                |                     | Lacks exons 1-9 [103]        | Encodes lncRNA composed of parts of exon 10 and 11 [103]                                         | Inhibits miR-203 and -101 binding to 3' UTR, which reduce BARD1-FL and isoform mRNA expression [103] |                                     |                                                                            |
|---------------------------------------|----------------|---------------------|------------------------------|--------------------------------------------------------------------------------------------------|------------------------------------------------------------------------------------------------------|-------------------------------------|----------------------------------------------------------------------------|
| <b>Pancreatic cancer</b>              |                |                     |                              |                                                                                                  |                                                                                                      |                                     |                                                                            |
| Reported as                           | Allelic change | Coding DNA location | Protein change               | Function                                                                                         | Mechanism                                                                                            | Associates with                     |                                                                            |
| BARD1 c.632T> A p.Leu211*             | T>A            | 632                 | Leu211X                      | Premature stop codon [113]                                                                       |                                                                                                      | Familial PDAC? [113]                |                                                                            |
| BARD1 c.1921C>T p.Arg641X             | C>T            | 1921                | Arg641X                      | Premature stop codon [114]                                                                       |                                                                                                      | PDAC? [114]                         | Breast – pathogenic [141-144]                                              |
| BARD1 c.69_70delins25 p.Ala25Glyfs*41 |                | 69_70               |                              | Deletion-insertion → premature stop codon [119]                                                  |                                                                                                      | Pancreatico-duodenal NEN [119]      |                                                                            |
| rs2229571                             | G>C            | 1207                | Arg378Ser [117]              |                                                                                                  |                                                                                                      |                                     | Breast – benign [137], decreased risk [138-139]<br>Cervical – benign [142] |
| rs1129804                             | C>G            | 44                  | 5' UTR [117]                 |                                                                                                  |                                                                                                      |                                     |                                                                            |
| <b>Non-small cell lung cancer</b>     |                |                     |                              |                                                                                                  |                                                                                                      |                                     |                                                                            |
| Reported as                           | Allelic change | Coding DNA location | Protein change               | Function                                                                                         | Mechanism                                                                                            | Associates with                     |                                                                            |
| β isoform                             |                |                     | Lacks exons 2 and 3 [18,122] | increased cellular proliferation, inhibited apoptosis and increased fibronectin expression [123] |                                                                                                      | Male sex, decreased DFS and OS [18] | Breast, ovarian, endometrial [13]                                          |

|                              |                |                     |                           |                                                          |                                                                                                      |                                                                    |                                   |
|------------------------------|----------------|---------------------|---------------------------|----------------------------------------------------------|------------------------------------------------------------------------------------------------------|--------------------------------------------------------------------|-----------------------------------|
| $\gamma$ isoform             |                |                     | Lacks exons 4-11 [18,122] |                                                          |                                                                                                      | Female sex [18]                                                    | Breast, ovarian, endometrial [13] |
| $\delta$ isoform             |                |                     | Lacks exons 2-6 [18,122]  |                                                          |                                                                                                      |                                                                    | Breast, ovarian, endometrial [13] |
| $\epsilon$ isoform           |                |                     | Lacks exons 4-9 [18,122]  |                                                          |                                                                                                      | Female sex [18]                                                    | Breast, ovarian, endometrial [13] |
| $\eta$ isoform               |                |                     | Lacks exons 2-9 [18,122]  |                                                          |                                                                                                      | Female sex [18]                                                    |                                   |
| $\kappa$ isoform             |                |                     | Lacks exon 3 [18]         |                                                          |                                                                                                      | Male sex, decreased DFS and OS [18]                                |                                   |
| $\pi$ isoform                |                |                     | Lacks part of exon 4 [18] |                                                          |                                                                                                      | Tumor progression, aggressive phenotype, decreased DFS and OS [18] |                                   |
| $\phi$ isoform               |                |                     | Lacks exons 3-6 [18,122]  |                                                          |                                                                                                      |                                                                    | Breast, ovarian, endometrial [13] |
| BARD1-FL [18,122]            |                |                     |                           |                                                          |                                                                                                      |                                                                    | Breast, ovarian, endometrial [13] |
| BARD1 9'L                    |                |                     | Lacks exons 1-9 [103]     | Encodes lncRNA composed of parts of exon 10 and 11 [103] | Inhibits miR-203 and -101 binding to 3' UTR, which reduce BARD1-FL and isoform mRNA expression [103] |                                                                    |                                   |
| <b>Nephroblastoma</b>        |                |                     |                           |                                                          |                                                                                                      |                                                                    |                                   |
| Reported as                  | Allelic change | Coding DNA location | Protein change            | Function                                                 | Mechanism                                                                                            | Associates with                                                    |                                   |
| rs7585356                    | G>A            |                     |                           |                                                          |                                                                                                      | Increased susceptibility, Stage I and II [127]                     |                                   |
| <b>Ewing sarcoma</b>         |                |                     |                           |                                                          |                                                                                                      |                                                                    |                                   |
| Reported as                  | Allelic change | Coding DNA location | Protein change            | Function                                                 | Mechanism                                                                                            | Associates with                                                    |                                   |
| BARD1 c.176_177AG p.E59Afs*8 |                | 176_177             | E59Afs*8                  | Frameshift mutation in RING domain [130]                 |                                                                                                      | Inheritance? [130]                                                 |                                   |

| Acute myeloid leukemia |                |                     |                                                 |                                            |                                    |                 |                                                                      |
|------------------------|----------------|---------------------|-------------------------------------------------|--------------------------------------------|------------------------------------|-----------------|----------------------------------------------------------------------|
| Reported as            | Allelic change | Coding DNA location | Protein change                                  | Function                                   | Mechanism                          | Associates with |                                                                      |
| $\alpha$ isoform       |                |                     | Lacks exon 2 [17]                               |                                            |                                    |                 | Breast, ovarian, endometrial [13]                                    |
| $\beta$ isoform        |                |                     | Lacks exons 2-3 [17]                            |                                            |                                    |                 | Breast, ovarian, endometrial [13]                                    |
| $\kappa$ isoform       |                |                     | Lacks exon 3 [17]                               |                                            |                                    |                 |                                                                      |
| $\pi$ isoform          |                |                     | Lacks part of exon 4 [17]                       |                                            |                                    |                 |                                                                      |
| $\omega 1$ isoform     |                |                     | Lacks exons 1 through N-terminus of exon 4 [17] | Defective mitosis, inhibits apoptosis [17] | Sequesters and stabilizes p53 [17] |                 | Breast, ovarian, endometrial, cervical – alternative start site [13] |
